# Supplementary material for: Neuropeptides PDF and DH31 hierarchically regulate free-running rhythmicity in Drosophila circadian locomotor activity
Source: PubMed Central journal article supplement (PMC6351594; doi:10.1038/s41598-018-37107-3), 2019-01-29
Supplement: 41598_2018_37107_MOESM2_ESM.pdf [file 41598_2018_37107_MOESM2_ESM.pdf]

# Table. S2. Goda et al.

One-way ANOVA for anticipation index

( $p < 0.0001$ : 1<sup>st</sup> and 3rd groups of rows,  $P = 0.0168$ : 2nd group of rows)

| Tukey's multiple comparisons test                                                   | Mean Diff. | q     | P Value | Summary |
|-------------------------------------------------------------------------------------|------------|-------|---------|---------|
| $w^{1118}$ vs. $Dh3I^{#51}$                                                         | 0.07386    | 6.213 | <0.0001 | ****    |
| $w^{1118}$ vs. $Pdf^{#01}$                                                          | 0.2719     | 21.74 | <0.0001 | ****    |
| $w^{1118}$ vs. $Dh3I^{#51}; Pdf^{#01}$                                              | 0.1248     | 9.599 | <0.0001 | ****    |
| $Dh3I^{#51}$ vs. $Pdf^{#01}$                                                        | 0.1981     | 14.63 | <0.0001 | ****    |
| $Dh3I^{#51}$ vs. $Dh3I^{#51}; Pdf^{#01}$                                            | 0.0509     | 3.637 | 0.0513  | ns      |
| $Pdf^{#01}$ vs. $Dh3I^{#51}; Pdf^{#01}$                                             | -0.1472    | 10.13 | <0.0001 | ****    |
| $UAS-Pdf/+; Dh3I^{#51}; Pdf^{#01}$ vs. $Pdf-Gal4/+; Dh3I^{#51}; Pdf^{#01}$          | -0.01797   | 1.55  | 0.8389  | ns      |
| $UAS-Pdf/+; Dh3I^{#51}; Pdf^{#01}$ vs. $Pdf-Gal4 > UAS-Pdf; Dh3I^{#51}; Pdf^{#01}$  | -0.1039    | 4.941 | 0.0175  | *       |
| $Pdf-Gal4/+; Dh3I^{#51}; Pdf^{#01}$ vs. $Pdf-Gal4 > UAS-Pdf; Dh3I^{#51}; Pdf^{#01}$ | -0.08589   | 3.5   | 0.0454  | *       |
| $w^{1118}$ vs. $Dh3Ir^{1/Df}$                                                       | 0.0534     | 2.919 | 0.1241  | ns      |
| $w^{1118}$ vs. $Pdf^{#5304}$                                                        | 0.2096     | 12.3  | <0.0001 | ****    |
| $w^{1118}$ vs. $Pdf^{#5304}; Dh3Ir^{1/Df}$                                          | 0.1027     | 6.857 | <0.0001 | ****    |
| $Dh3Ir^{1/Df}$ vs. $Pdf^{#5304}$                                                    | 0.1562     | 7.166 | <0.0001 | ****    |
| $Dh3Ir^{1/Df}$ vs. $Pdf^{#5304}; Dh3Ir^{1/Df}$                                      | 0.04927    | 2.365 | 0.2165  | ns      |
| $Pdf^{#5304}$ vs. $Pdf^{#5304}; Dh3Ir^{1/Df}$                                       | -0.1069    | 5.957 | 0.0002  | ***     |
